# Supplementary material for: Effective uranium(vi) sorption from alkaline media using bi-functionalized silica-coated magnetic nanoparticles
Source: Royal Society of Chemistry journal article supplement (doi:10.1039/c5ra07436c), 2015-01-01
Supplement: c5ra07436c1.pdf [file c5ra07436c1.pdf]

# Effective uranium (VI) sorption from alkaline media using bi-functionalized silica-coated magnetic nanoparticles

Xiao-tong Chen\*, Lin-feng He, Rong-zheng Liu, Chi Zhang, Bing Liu, Ya-ping Tang

Collaborative Innovation Center of Advanced Nuclear Energy Technology, Institution of Nuclear and New Energy Technology, Tsinghua University, Beijing 100084, China

\*To whom correspondence should be addressed:

Fax: 86-10-69771464; Tel: +86-10-89796097. E-mail: [chenxiaotong@tsinghua.edu.cn](mailto:chenxiaotong@tsinghua.edu.cn).

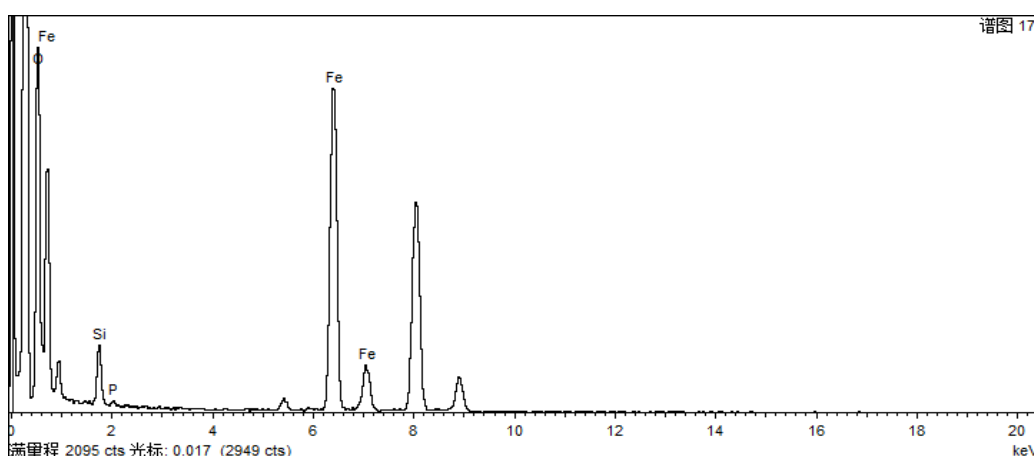

Figure S1 The energy-dispersive X-ray spectrum (EDS) of **2**

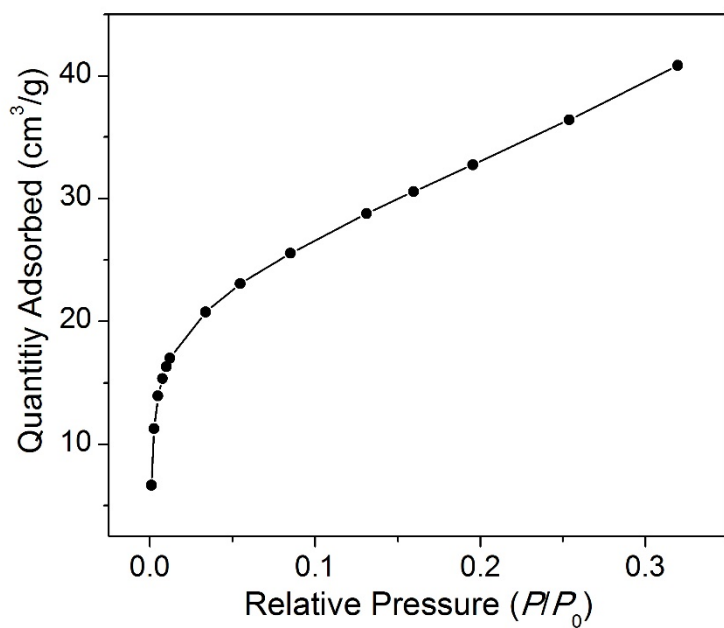

Figure S2 The N<sub>2</sub> adsorption isotherm of 3

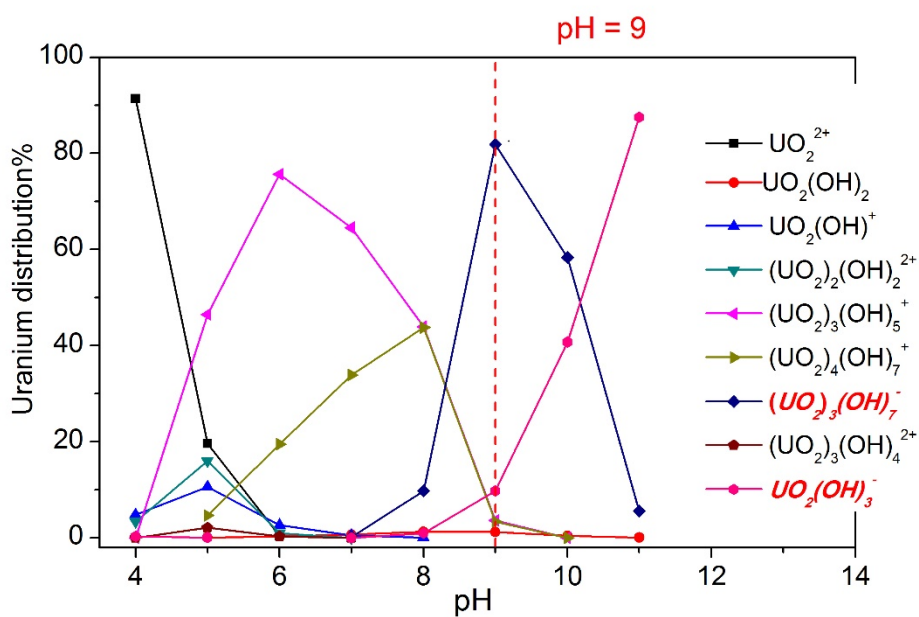

Figure S3 Uranium species distribution from pH 4 to pH 11 at uranium concentration of 21.7 ppm based on software of Visual MINTEQ.

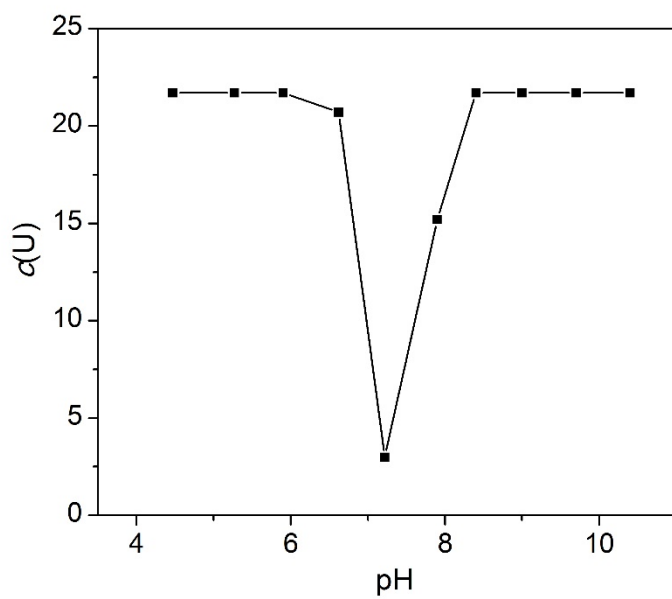

Figure S4. The blank experiment without any sorbents at U(VI) concentration of 21.7 mg/L.

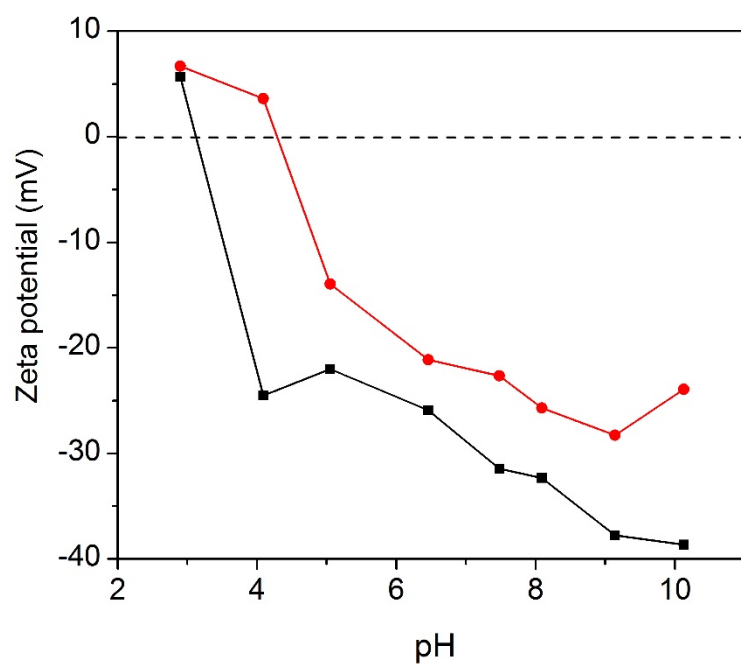

Figure S5 Zeta potential of **1** (black line) and **2** (red line) at pH range from 3.0 to 10.0

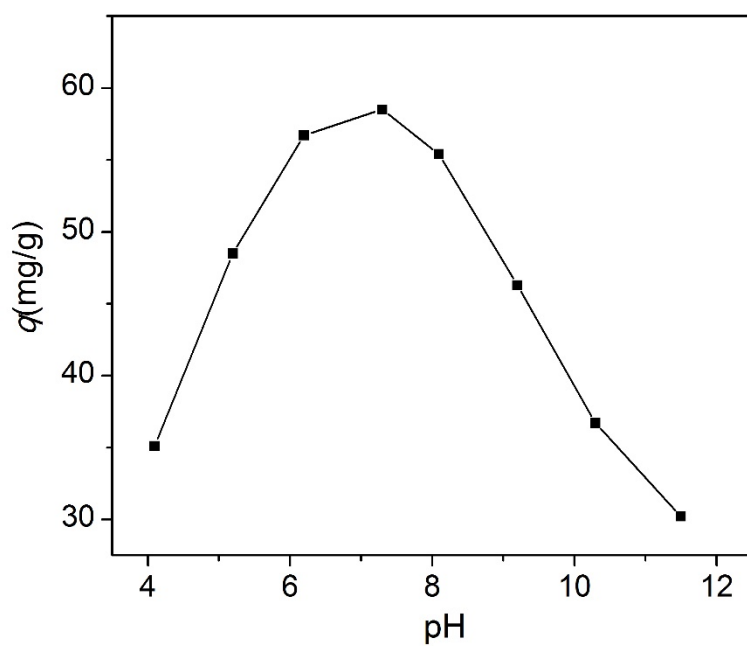

Figure S6 Effect of initial pH on the sorption capacity of U(VI) on **4**.  $c(\text{U(VI)}) = 21.7 \text{ mg/L}$ .

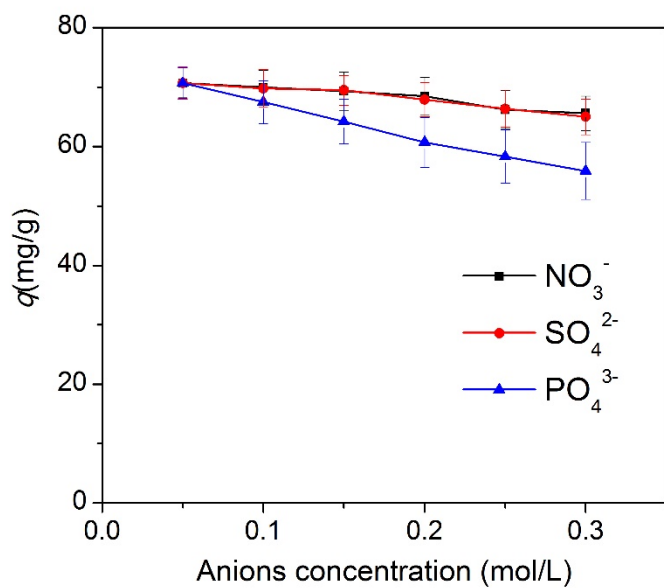

Figure S7 Effect of anions effect on the sorption capacity of U(VI) on **2**. U(VI) concentration was  $21.7 \text{ mg/L}$ .  $\text{pH} = 9.0$ .
